# Supplementary material
Source: HighWire-hosted journal article supplement (http://rc.rcjournal.com/highwire/filestream/26469/field_highwire_adjunct_files/1/Table_S1_Supplemental_Digital_Content.docx)
Supplement: Table_S1_Supplemental_Digital_Content.docx [file Table_S1_Supplemental_Digital_Content.docx]

**Supplementary Material**

**Table S1. Search Terms for the Identification of Eligible References for Scoping Review**

| **Database (date)** | **Search terms** | **Results** |
| --- | --- | --- |
| PubMed (NCBI)  October 26, 2020 | ("prone position" [MeSH] OR "prone position" OR "prone positions" OR "prone positioning" OR “pronation" OR “prone” OR “proning” OR "pronation/methods" OR "ventral decubitus") AND ("mechanical ventilation" OR "mechanically ventilated" OR "mechanical ventilator" OR "artificial, respiration" OR "artificial respiration" OR "mechanical ventilations" OR "respiration, artificial" [MeSH]) AND (“adult respiratory distress syndrome” OR "respiratory distress syndrome, adult" [MeSH] OR “respiratory distress syndrome, adult” OR “respiratory insufficiency” OR "acute respiratory failure" OR "acute respiratory distress syndrome" OR “respiratory failure” OR “lung insufficiency” OR “ARDS” OR “acute lung injury” OR “COVID-19” OR “coronavirus” [MeSH] OR “coronavirus” OR “SARS-CoV-2” OR “2019nCoV” OR “2019-nCoV”)  **Limits:** from July 1, 2013 to November 1, 2020  **Language filters:** English and Spanish | 444 |
| CINAHL Plus with full text (EBSCO)  October 26, 2020 | ("prone position" [MeSH] OR "prone position" OR "prone positions" OR "prone positioning" OR “pronation" OR “prone” OR “proning” OR "pronation/methods" OR "ventral decubitus") AND ("mechanical ventilation" OR "mechanically ventilated" OR "mechanical ventilator" OR "artificial, respiration" OR "artificial respiration" OR "mechanical ventilations" OR "respiration, artificial" [MeSH]) AND (“adult respiratory distress syndrome” OR "respiratory distress syndrome, adult" [MeSH] OR “respiratory distress syndrome, adult” OR “respiratory insufficiency” OR "acute respiratory failure" OR "acute respiratory distress syndrome" OR “respiratory failure” OR “lung insufficiency” OR “ARDS” OR “acute lung injury” OR “COVID-19” OR “coronavirus” [MeSH] OR “coronavirus” OR “SARS-CoV-2” OR “2019nCoV” OR “2019-nCoV”)  **Limits:** from July 1, 2013 to November 1, 2020  **Language filters:** English and Spanish | 182 |
| LILACS  November 1, 2020 | (prono OR prono-supinacion OR prono-supination) AND (ventilacion mecanica OR ventilacion en invasivo OR respiracion artificial OR ventiladores mecanicos) AND (insuficiencia respiratoria OR falla respiratoria OR ARDS OR coronavirus)  **Limits:** from July 1, 2013 to November 1, 2020  **Language filters:** Spanish | 84 |
| WorldWideScience  November 1, 2020 | "prone” AND "acute respiratory distress" AND “complications” AND “Meralgia Paresthetica”  **Limits:** from July 1, 2013 to November 1, 2020  **Language filters:** English and Spanish | 11 |
| Scientific Electronic Library Online (SciELO)  October 31, 2020 | (prone) AND (respiratory distress syndrome, adult)  **Limits:** from July 1, 2013 to November 1, 2020  **Language filters:** English and Spanish | 8 |
| Cochrane Library  October 28, 2020 | (prone position OR prone positions OR prone positioning OR pronation OR prone OR proning OR ventral decubitus) AND (mechanical ventilation OR mechanically ventilated OR mechanical ventilator OR artificial, respiration OR artificial respiration OR mechanical ventilations OR respiration, artificial) AND (adult respiratory distress syndrome OR respiratory distress syndrome, adult OR respiratory insufficiency OR acute respiratory failure OR acute respiratory distress syndrome OR respiratory failure OR lung insufficiency OR ARDS OR acute lung injury OR coronavirus OR 2019nCoV)  **Limits:** from July 1, 2013 to November 1, 2020  **Language filters:** English and Spanish | 3 |
